# Supplementary material
Source: PubMed Central journal article supplement (PMC8730300)
Supplement: deab235_supplementary_figure_s1.pdf [file deab235_supplementary_figure_s1.pdf]

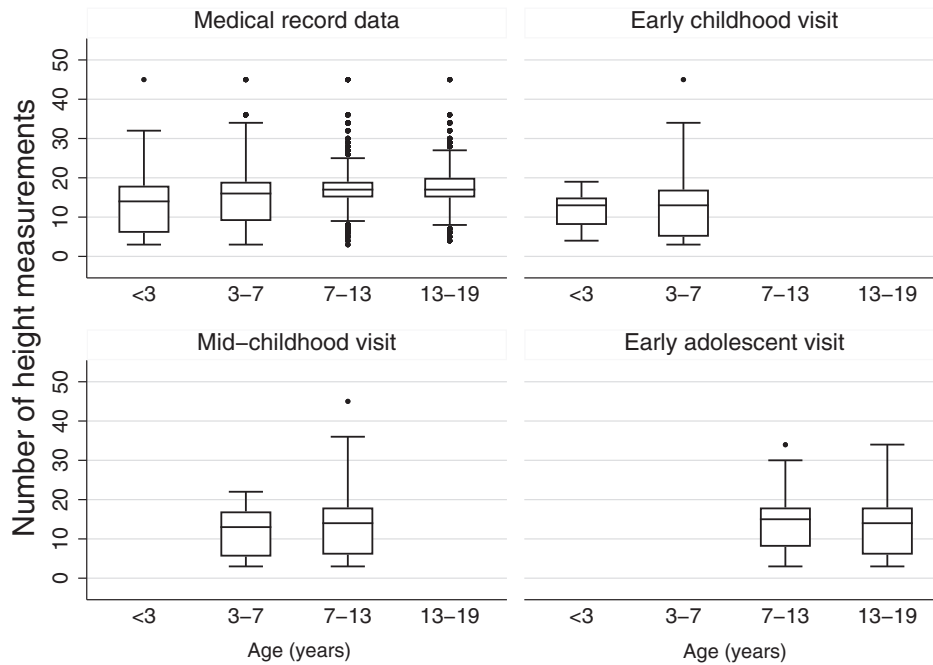

**Supplementary Figure S1.** Box and whisker plots representing the distribution of the number of height measurements according to the method of ascertainment (i.e. research visits (n = 2811 measurements) versus medical records (n = 12 259 measurements)). The box represents the range of values from the first quartile to the third quartile, with the horizontal line in the box representing the median. The ‘whiskers’ represent values that go from each quartile to the minimum or maximum.
