# Supplementary material
Source: PubMed Central journal article supplement (PMC8730300)
Supplement: deab235_supplementary_figure_s2.pdf [file deab235_supplementary_figure_s2.pdf]

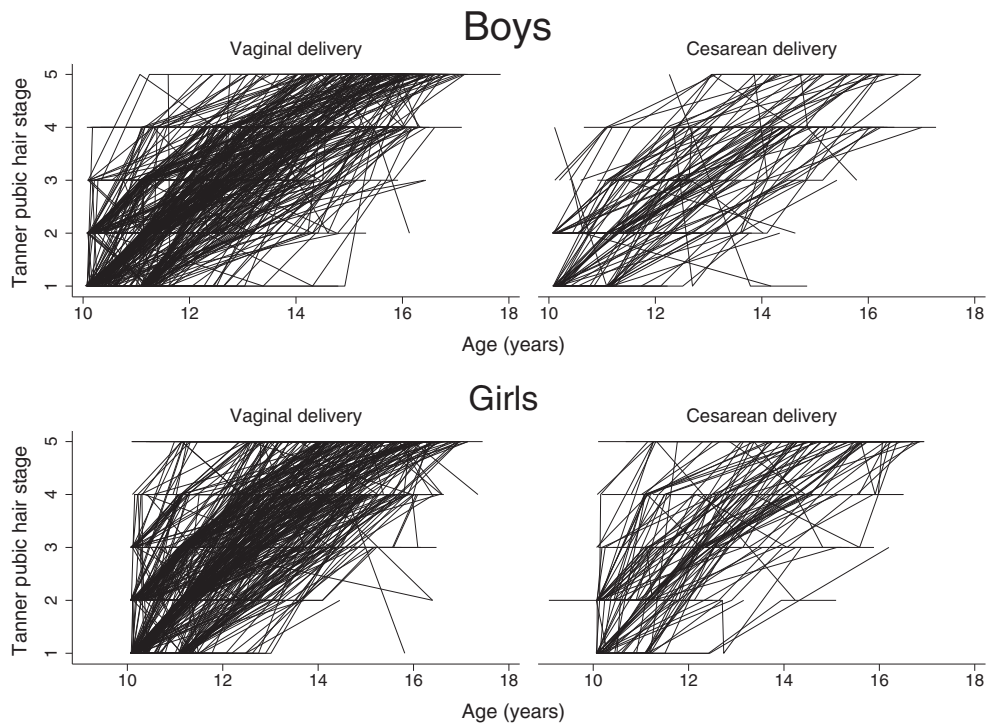

Supplementary Figure S2. Spaghetti plot of Tanner pubic hair staging across all visits according to mode of delivery.
