# Supplementary material
Source: PubMed Central journal article supplement (PMC8730300)
Supplement: deab235_supplementary_figure_s3.pdf [file deab235_supplementary_figure_s3.pdf]

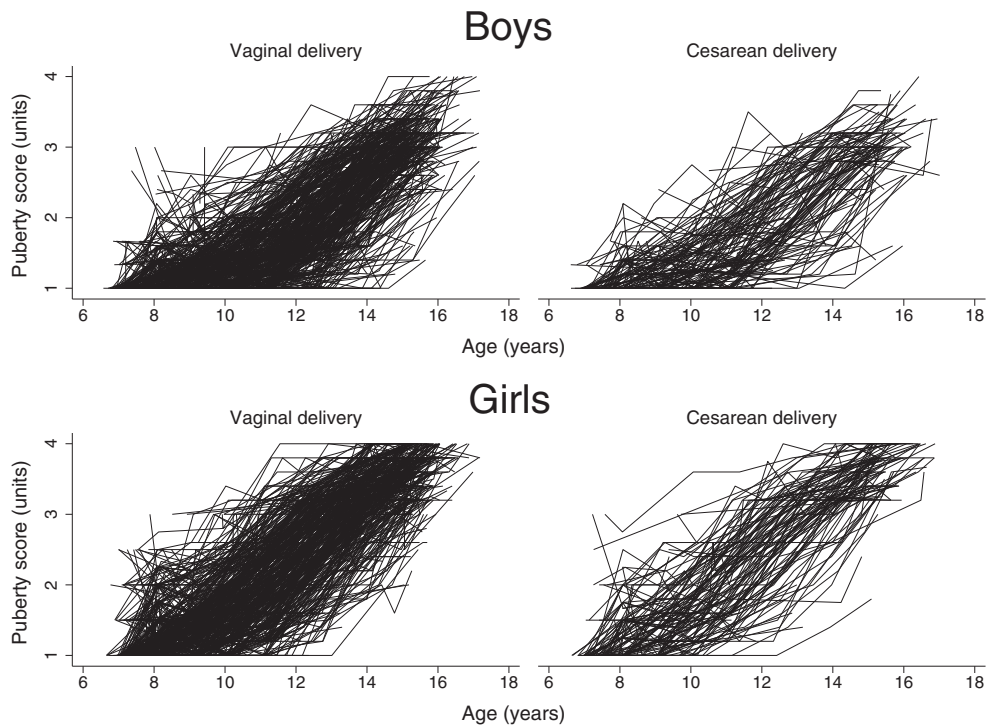

**Supplementary Figure S3.** Spaghetti plot of puberty score across all visits according to mode of delivery.
