# Supplementary material
Source: PubMed Central journal article supplement (PMC8730300)
Supplement: deab235_supplementary_figure_s9.pdf [file deab235_supplementary_figure_s9.pdf]

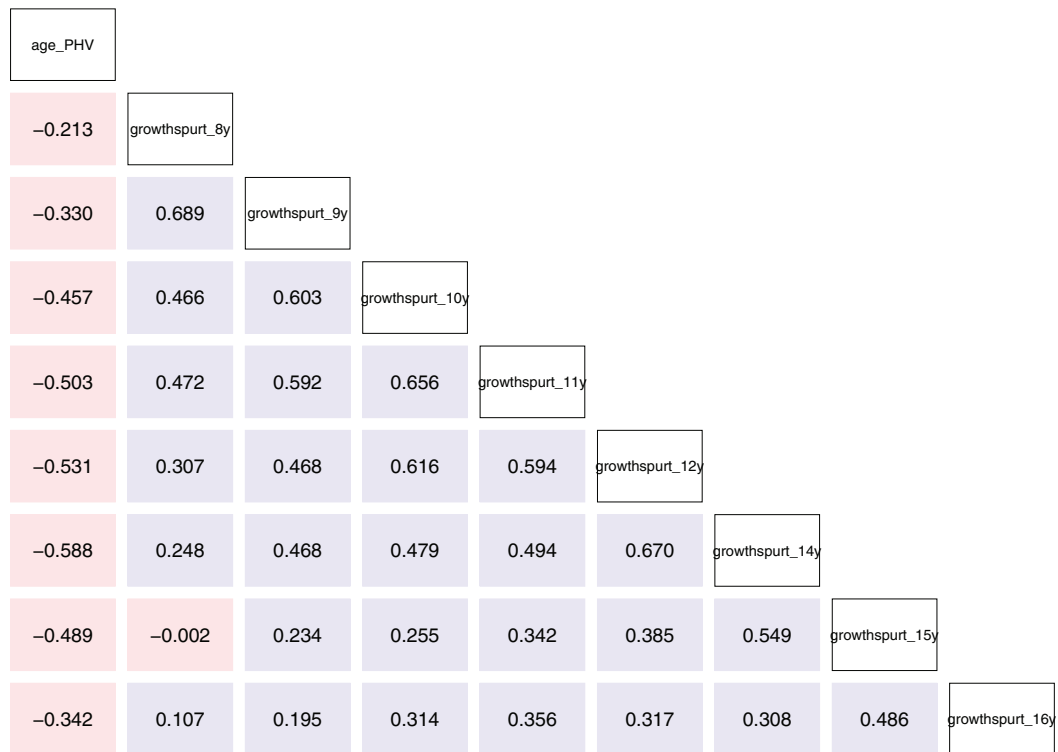

**Supplementary Figure S9.** Spearman's correlation matrix of parent-reported growth spurt and age at PHV in girls. Blue = positive correlation. Red = negative correlation.
