# Supplementary material
Source: PubMed Central journal article supplement (PMC8730300)
Supplement: deab235_supplementary_table_s1.pdf [file deab235_supplementary_table_s1.pdf]

**Supplementary Table S1** Distribution and variability of parent- and child-reported pubertal development markers over study visits in boys.

|                                       | Mid-childhood<br>Median: 7.6y<br>IQR: 7.3–7.9y<br>n = 457 <sup>a</sup> | 8y<br>Median: 8.1y<br>IQR: 8.0–8.2y<br>n = 304 | 9y<br>Median: 9.1y<br>IQR: 9.0–9.4y<br>n = 383 | 10y<br>Median: 10.2y<br>IQR: 10.0–10.4<br>n = 337 | 11y<br>Median: 11.2y<br>IQR: 11.1–11.4y<br>n = 301 | Early adolescent<br>Median: 12.9y<br>IQR: 12.5–13.8y<br>n = 535 | 14y<br>Median: 14.3y<br>IQR: 14.1–14.7y<br>n = 263 | 15y<br>Median: 15.4y<br>IQR: 15.2–15.7y<br>n = 292 | 16y<br>Median: 16.5y<br>IQR: 16.2–16.8y<br>n = 368 |
|---------------------------------------|------------------------------------------------------------------------|------------------------------------------------|------------------------------------------------|---------------------------------------------------|----------------------------------------------------|-----------------------------------------------------------------|----------------------------------------------------|----------------------------------------------------|----------------------------------------------------|
| <b>Mean (SD) puberty score</b>        | 1.1 (0.3)                                                              | 1.2 (0.3)                                      | 1.2 (0.3)                                      | 1.3 (0.4)                                         | 1.4 (0.5)                                          | 2.2 (0.7)                                                       | 2.7 (0.6)                                          | 3.0 (0.5)                                          | 3.2 (0.4)                                          |
| <b>Median (IQR) puberty score</b>     | 1.0 (0.0)                                                              | 1.0 (0.4)                                      | 1.2 (0.4)                                      | 1.3 (0.5)                                         | 1.3 (0.8)                                          | 2.3 (1.2)                                                       | 2.8 (0.8)                                          | 3.0 (0.4)                                          | 3.2 (0.4)                                          |
| <b>Puberty score &gt; 1 (n, %)</b>    | 66 (14.5)                                                              | 139 (45.9)                                     | 195 (50.9)                                     | 197 (58.5)                                        | 214 (71.1)                                         | 497 (92.9)                                                      | 248 (98.4)                                         | 285 (100)                                          | 368 (100)                                          |
| <b>Voice deepening (n, %)</b>         |                                                                        |                                                |                                                |                                                   |                                                    |                                                                 |                                                    |                                                    |                                                    |
| Not yet started                       | 439 (96.7)                                                             | 291 (96.4)                                     | 358 (94.0)                                     | 307 (91.4)                                        | 260 (86.7)                                         | 194 (36.7)                                                      | 22 (8.9)                                           | 5 (1.8)                                            | 1 (0.3)                                            |
| Barely started                        | 9 (2.0)                                                                | 7 (2.3)                                        | 14 (3.7)                                       | 23 (6.8)                                          | 28 (9.3)                                           | 93 (17.6)                                                       | 32 (12.9)                                          | 15 (5.3)                                           | 8 (2.2)                                            |
| Definitely started                    | 6 (1.3)                                                                | 3 (1.0)                                        | 8 (2.1)                                        | 6 (1.8)                                           | 11 (3.7)                                           | 165 (31.2)                                                      | 122 (49.2)                                         | 136 (48.1)                                         | 129 (35.1)                                         |
| Seems complete                        | 0 (0)                                                                  | 1 (0.3)                                        | 1 (0.3)                                        | 0 (0)                                             | 1 (0.3)                                            | 77 (14.6)                                                       | 72 (29.0)                                          | 127 (44.9)                                         | 229 (62.4)                                         |
| <b>Body hair growth (n, %)</b>        |                                                                        |                                                |                                                |                                                   |                                                    |                                                                 |                                                    |                                                    |                                                    |
| Not yet started                       | 394 (87.6)                                                             | 270 (89.1)                                     | 331 (86.9)                                     | 276 (82.4)                                        | 202 (67.6)                                         | 127 (25.0)                                                      | 19 (7.9)                                           | 8 (2.9)                                            | 2 (0.5)                                            |
| Barely started                        | 36 (8.0)                                                               | 23 (7.6)                                       | 33 (8.7)                                       | 35 (10.4)                                         | 60 (20.1)                                          | 94 (18.5)                                                       | 41 (17.0)                                          | 22 (7.9)                                           | 18 (4.9)                                           |
| Definitely started                    | 17 (3.8)                                                               | 10 (3.3)                                       | 17 (4.5)                                       | 24 (7.2)                                          | 37 (12.4)                                          | 247 (48.6)                                                      | 153 (63.5)                                         | 177 (63.9)                                         | 201 (55.2)                                         |
| Seems complete                        | 3 (0.7)                                                                | 0 (0)                                          | 0 (0)                                          | 0 (0)                                             | 0 (0)                                              | 40 (7.9)                                                        | 28 (11.6)                                          | 70 (25.3)                                          | 143 (39.3)                                         |
| <b>Facial hair growth (n, %)</b>      |                                                                        |                                                |                                                |                                                   |                                                    |                                                                 |                                                    |                                                    |                                                    |
| Not yet started                       | 439 (96.7)                                                             | 297 (98.0)                                     | 363 (94.8)                                     | 327 (97.0)                                        | 140 (90.9)                                         | 254 (47.7)                                                      | 53 (21.4)                                          | 34 (12.0)                                          | 15 (4.1)                                           |
| Barely started                        | 13 (2.9)                                                               | 6 (2.0)                                        | 18 (4.7)                                       | 7 (2.1)                                           | 12 (7.8)                                           | 144 (27.1)                                                      | 80 (32.3)                                          | 66 (23.3)                                          | 69 (19.0)                                          |
| Definitely started                    | 2 (0.4)                                                                | 0 (0)                                          | 2 (0.5)                                        | 3 (0.9)                                           | 2 (1.3)                                            | 123 (23.1)                                                      | 111 (44.8)                                         | 165 (58.3)                                         | 230 (63.2)                                         |
| Seems complete                        | 0 (0)                                                                  | 0 (0)                                          | 0 (0)                                          | 0 (0)                                             | 0 (0)                                              | 11 (2.1)                                                        | 4 (1.6)                                            | 18 (6.4)                                           | 50 (13.7)                                          |
| <b>Acne (n, %)</b>                    |                                                                        |                                                |                                                |                                                   |                                                    |                                                                 |                                                    |                                                    |                                                    |
| Not yet started                       | –                                                                      | 273 (91.0)                                     | 324 (84.6)                                     | 259 (77.3)                                        | 185 (61.9)                                         | 126 (23.8)                                                      | 16 (6.4)                                           | 6 (2.1)                                            | 6 (1.6)                                            |
| Barely started                        | –                                                                      | 24 (8.0)                                       | 38 (9.9)                                       | 58 (17.3)                                         | 79 (26.4)                                          | 137 (25.8)                                                      | 58 (23.1)                                          | 43 (15.2)                                          | 19 (5.2)                                           |
| Definitely started                    | –                                                                      | 3 (1.0)                                        | 21 (5.5)                                       | 18 (5.4)                                          | 33 (11.0)                                          | 254 (47.9)                                                      | 169 (67.3)                                         | 212 (75.2)                                         | 285 (77.7)                                         |
| Seems complete                        | –                                                                      | 0 (0)                                          | 0 (0)                                          | 0 (0)                                             | 2 (0.7)                                            | 13 (2.5)                                                        | 8 (3.2)                                            | 21 (7.4)                                           | 57 (15.5)                                          |
| <b>Growth spurt (n, %)</b>            |                                                                        |                                                |                                                |                                                   |                                                    |                                                                 |                                                    |                                                    |                                                    |
| Not yet started                       | –                                                                      | 172 (58.7)                                     | 212 (57.6)                                     | 162 (50.0)                                        | 141 (47.8)                                         | 90 (17.0)                                                       | 13 (5.2)                                           | 7 (2.5)                                            | 3 (0.8)                                            |
| Barely started                        | –                                                                      | 50 (17.1)                                      | 87 (23.6)                                      | 74 (22.8)                                         | 73 (24.7)                                          | 110 (20.8)                                                      | 32 (12.9)                                          | 12 (4.3)                                           | 8 (2.2)                                            |
| Definitely started                    | –                                                                      | 71 (24.2)                                      | 68 (18.5)                                      | 87 (26.9)                                         | 80 (27.1)                                          | 307 (58.1)                                                      | 192 (77.4)                                         | 237 (84.3)                                         | 248 (68.5)                                         |
| Seems complete                        | –                                                                      | –                                              | 1 (0.3)                                        | 1 (0.3)                                           | 1 (0.3)                                            | 21 (4.0)                                                        | 11 (4.4)                                           | 25 (8.9)                                           | 103 (28.5)                                         |
| <b>Tanner pubic hair stage (n, %)</b> |                                                                        |                                                |                                                |                                                   |                                                    |                                                                 |                                                    |                                                    |                                                    |
| 1                                     | –                                                                      | –                                              | –                                              | 199 (56.5)                                        | 95 (31.9)                                          | 21 (4.3)                                                        | 3 (1.9)                                            | 0 (0)                                              | 0 (0)                                              |
| 2                                     | –                                                                      | –                                              | –                                              | 121 (34.4)                                        | 127 (42.6)                                         | 79 (16.2)                                                       | 11 (6.9)                                           | 1 (0.5)                                            | 2 (0.7)                                            |
| 3                                     | –                                                                      | –                                              | –                                              | 25 (7.1)                                          | 52 (17.4)                                          | 132 (27.1)                                                      | 22 (13.8)                                          | 11 (5.8)                                           | 9 (3.0)                                            |
| 4                                     | –                                                                      | –                                              | –                                              | 7 (2.0)                                           | 22 (7.4)                                           | 185 (38.0)                                                      | 77 (48.1)                                          | 80 (42.3)                                          | 86 (29.0)                                          |
| 5                                     | –                                                                      | –                                              | –                                              | 0                                                 | 2 (0.7)                                            | 70 (14.4)                                                       | 47 (29.4)                                          | 97 (51.3)                                          | 200 (67.3)                                         |

<sup>a</sup>Sample sizes restricted to subjects without missing exposure and covariate data, and with at least 1 pubertal outcome. IQR, interquartile range.
