# Supplementary material
Source: PubMed Central journal article supplement (PMC8730300)
Supplement: deab235_supplementary_table_s2.pdf [file deab235_supplementary_table_s2.pdf]

**Supplementary Table S11** Distribution and variability of parent- and child-reported pubertal development markers over study visits in girls.

|                                    | Mid-childhood<br>Median: 7.6y<br>IQR: 7.3–7.9y<br>n = 439 <sup>a</sup> | 8y<br>Median: 8.1y<br>IQR: 8.0–8.2y<br>n = 279 | 9y<br>Median: 9.1y<br>IQR: 9.0–9.4y<br>n = 366 | 10y<br>Median: 10.2y<br>IQR: 10.0–10.4<br>n = 323 | 11y<br>Median: 11.2y<br>IQR: 11.1–11.4y<br>n = 293 | Early adolescent<br>Median: 12.9y<br>IQR: 12.5–13.8y<br>n = 502 | 14y<br>Median: 14.3y<br>IQR: 14.1–14.6y<br>n = 266 | 15y<br>Median: 15.4y<br>IQR: 15.2–15.7y<br>n = 311 | 16y<br>Median: 16.5y<br>IQR: 16.4–16.6y<br>n = 335 |
|------------------------------------|------------------------------------------------------------------------|------------------------------------------------|------------------------------------------------|---------------------------------------------------|----------------------------------------------------|-----------------------------------------------------------------|----------------------------------------------------|----------------------------------------------------|----------------------------------------------------|
| <b>Mean (SD) puberty score</b>     | 1.2 (0.5)                                                              | 1.4 (0.4)                                      | 1.5 (0.4)                                      | 1.7 (0.5)                                         | 2.0 (0.7)                                          | 2.9 (0.7)                                                       | 3.3 (0.5)                                          | 3.6 (0.4)                                          | 3.7 (0.3)                                          |
| <b>Median (IQR) puberty score</b>  | 1.0 (0.5)                                                              | 1.3 (0.5)                                      | 1.4 (0.6)                                      | 1.6 (0.8)                                         | 2.0 (1.1)                                          | 3.2 (1.0)                                                       | 3.4 (0.4)                                          | 3.7 (0.4)                                          | 3.8 (0.4)                                          |
| <b>Puberty score &gt; 1 (%)</b>    | 117 (26.7)                                                             | 167 (59.9)                                     | 274 (74.1)                                     | 280 (86.4)                                        | 273 (93.5)                                         | 499 (99.4)                                                      | 263 (100)                                          | 305 (100)                                          | 335 (100)                                          |
| <b>Breast development (%)</b>      |                                                                        |                                                |                                                |                                                   |                                                    |                                                                 |                                                    |                                                    |                                                    |
| Not yet started                    | 354 (82.1)                                                             | 218 (79.0)                                     | 216 (59.0)                                     | 117 (36.6)                                        | 52 (17.9)                                          | 12 (2.4)                                                        | 0 (0)                                              | 0 (0)                                              | 0 (0)                                              |
| Barely started                     | 51 (11.8)                                                              | 42 (15.2)                                      | 96 (26.2)                                      | 95 (29.7)                                         | 96 (33.1)                                          | 66 (13.2)                                                       | 11 (4.2)                                           | 2 (0.7)                                            | 0 (0)                                              |
| Definitely started                 | 26 (6.0)                                                               | 16 (5.8)                                       | 54 (14.8)                                      | 108 (33.8)                                        | 139 (47.9)                                         | 339 (67.9)                                                      | 153 (58.8)                                         | 129 (42.9)                                         | 92 (27.7)                                          |
| Seems complete                     | 0 (0)                                                                  | 0 (0)                                          | 0 (0)                                          | 0 (0)                                             | 3 (1.0)                                            | 82 (16.4)                                                       | 96 (36.9)                                          | 170 (56.5)                                         | 240 (72.3)                                         |
| <b>Body hair growth (%)</b>        |                                                                        |                                                |                                                |                                                   |                                                    |                                                                 |                                                    |                                                    |                                                    |
| Not yet started                    | 363 (83.3)                                                             | 228 (82.0)                                     | 263 (71.1)                                     | 172 (53.9)                                        | 92 (31.7)                                          | 30 (6.3)                                                        | 0 (0)                                              | 0 (0)                                              | 0 (0)                                              |
| Barely started                     | 40 (9.2)                                                               | 35 (12.6)                                      | 62 (16.8)                                      | 74 (23.2)                                         | 60 (20.7)                                          | 37 (7.8)                                                        | 7 (2.7)                                            | 3 (1.0)                                            | 0 (0)                                              |
| Definitely started                 | 32 (7.3)                                                               | 15 (5.4)                                       | 44 (11.9)                                      | 70 (21.9)                                         | 123 (42.4)                                         | 255 (53.8)                                                      | 129 (50.4)                                         | 75 (25.9)                                          | 55 (17.1)                                          |
| Seems complete                     | 1 (0.2)                                                                | 0 (0)                                          | 1 (0.3)                                        | 3 (0.9)                                           | 15 (5.2)                                           | 152 (32.1)                                                      | 120 (46.9)                                         | 212 (73.1)                                         | 266 (82.9)                                         |
| <b>Acne (%)</b>                    |                                                                        |                                                |                                                |                                                   |                                                    |                                                                 |                                                    |                                                    |                                                    |
| Not yet started                    | –                                                                      | 230 (82.4)                                     | 270 (73.4)                                     | 177 (54.8)                                        | 102 (34.9)                                         | 52 (10.4)                                                       | 13 (5.0)                                           | 8 (2.7)                                            | 1 (0.3)                                            |
| Barely started                     | –                                                                      | 41 (14.7)                                      | 74 (20.1)                                      | 98 (30.3)                                         | 104 (35.6)                                         | 115 (23.0)                                                      | 46 (17.7)                                          | 15 (5.0)                                           | 21 (6.4)                                           |
| Definitely started                 | –                                                                      | 8 (2.9)                                        | 24 (6.5)                                       | 47 (14.6)                                         | 80 (27.4)                                          | 295 (59.0)                                                      | 167 (64.2)                                         | 197 (65.4)                                         | 183 (55.5)                                         |
| Seems complete                     | –                                                                      | 0 (0)                                          | 0 (0)                                          | 1 (0.3)                                           | 6 (2.1)                                            | 38 (7.6)                                                        | 34 (13.1)                                          | 81 (26.9)                                          | 125 (37.9)                                         |
| <b>Growth spurt (%)</b>            |                                                                        |                                                |                                                |                                                   |                                                    |                                                                 |                                                    |                                                    |                                                    |
| Not yet started                    | –                                                                      | 123 (46.6)                                     | 127 (36.2)                                     | 109 (35.2)                                        | 66 (22.8)                                          | 27 (5.5)                                                        | 3 (1.2)                                            | 1 (0.3)                                            | 2 (0.6)                                            |
| Barely started                     | –                                                                      | 57 (21.6)                                      | 98 (27.9)                                      | 73 (23.5)                                         | 74 (25.6)                                          | 67 (13.7)                                                       | 16 (6.4)                                           | 4 (1.4)                                            | 3 (0.9)                                            |
| Definitely started                 | –                                                                      | 83 (31.4)                                      | 125 (35.6)                                     | 125 (40.3)                                        | 141 (48.8)                                         | 298 (61.1)                                                      | 126 (50.2)                                         | 93 (31.8)                                          | 56 (17.1)                                          |
| Seems complete                     | –                                                                      | 1 (0.4)                                        | 1 (0.3)                                        | 3 (1.0)                                           | 8 (2.8)                                            | 96 (19.7)                                                       | 106 (42.2)                                         | 194 (66.4)                                         | 267 (81.4)                                         |
| <b>Menarche (%)</b>                |                                                                        |                                                |                                                |                                                   |                                                    |                                                                 |                                                    |                                                    |                                                    |
| No                                 | –                                                                      | –                                              | 364 (99.2)                                     | 313 (97.5)                                        | 253 (87.2)                                         | 173 (34.7)                                                      | 31 (11.9)                                          | 10 (3.3)                                           | 4 (1.2)                                            |
| Yes                                | –                                                                      | –                                              | 3 (0.8)                                        | 8 (2.5)                                           | 37 (12.8)                                          | 326 (65.3)                                                      | 229 (88.1)                                         | 290 (96.7)                                         | 329 (98.8)                                         |
| <b>Tanner pubic hair stage (%)</b> |                                                                        |                                                |                                                |                                                   |                                                    |                                                                 |                                                    |                                                    |                                                    |
| 1                                  | –                                                                      | –                                              | –                                              | 179 (49.3)                                        | 60 (18.9)                                          | 11 (2.4)                                                        | 0 (0)                                              | 1 (0.5)                                            | 0 (0)                                              |
| 2                                  | –                                                                      | –                                              | –                                              | 124 (34.2)                                        | 112 (35.3)                                         | 50 (11.1)                                                       | 3 (1.6)                                            | 2 (0.9)                                            | 3 (0.9)                                            |
| 3                                  | –                                                                      | –                                              | –                                              | 43 (11.8)                                         | 81 (25.6)                                          | 105 (23.2)                                                      | 20 (10.8)                                          | 12 (5.5)                                           | 13 (4.0)                                           |
| 4                                  | –                                                                      | –                                              | –                                              | 12 (3.3)                                          | 40 (12.6)                                          | 165 (36.5)                                                      | 73 (39.2)                                          | 62 (28.3)                                          | 68 (20.9)                                          |
| 5                                  | –                                                                      | –                                              | –                                              | 5 (1.4)                                           | 24 (7.6)                                           | 121 (26.8)                                                      | 90 (48.4)                                          | 142 (64.8)                                         | 242 (74.2)                                         |

<sup>a</sup>Sample sizes restricted to subjects without missing exposure and covariate data, and with at least 1 pubertal outcome.
