# Supplementary material
Source: PubMed Central journal article supplement (PMC8730300)
Supplement: deab235_supplementary_table_s3.pdf [file deab235_supplementary_table_s3.pdf]

human reproduction SUPPLEMENTARY DATA

**Supplementary Table SIII Characteristics of study sample according to delivery mode as a three-category variable.**

|                                                                  | Vaginal<br>n = 736 (76.8%) | Planned cesarean<br>n = 75 (7.8%) | Unplanned cesarean<br>n = 147 (15.4%) | P-value <sup>a</sup> |
|------------------------------------------------------------------|----------------------------|-----------------------------------|---------------------------------------|----------------------|
| <b>Maternal characteristics</b>                                  |                            |                                   |                                       |                      |
|                                                                  | <b>Mean (SD) or %</b>      |                                   |                                       |                      |
| Age at enrollment (years)                                        | 32.6 (4.7)                 | 34.1 (4.4)                        | 32.7 (4.3)                            | 0.02                 |
| Race/ethnicity                                                   |                            |                                   |                                       | 0.27                 |
| White                                                            | 76.1                       | 66.7                              | 68.0                                  |                      |
| Black                                                            | 10.6                       | 14.7                              | 14.3                                  |                      |
| Hispanic                                                         | 5.6                        | 9.3                               | 6.8                                   |                      |
| Asian                                                            | 5.0                        | 5.3                               | 4.8                                   |                      |
| Other/More than 1 race or ethnicity                              | 2.7                        | 4.0                               | 6.1                                   |                      |
| College graduate                                                 | 75.3                       | 69.3                              | 80.3                                  | 0.19                 |
| Household income >\$70 000/year                                  | 66.4                       | 64.0                              | 59.2                                  | 0.24                 |
| Smoking history                                                  |                            |                                   |                                       | 0.79                 |
| Never                                                            | 70.5                       | 74.7                              | 70.8                                  |                      |
| Before pregnancy                                                 | 20.8                       | 20.0                              | 19.1                                  |                      |
| During pregnancy                                                 | 8.7                        | 5.3                               | 10.2                                  |                      |
| Height (m)                                                       | 1.66 (0.07)                | 1.65 (0.07)                       | 1.63 (0.08)                           | 0.0006               |
| Pre-pregnancy BMI (kg/m <sup>2</sup> )                           | 24.4 (4.8)                 | 26.0 (6.1)                        | 25.9 (6.3)                            | 0.005                |
| Total gestational weight gain (kg)                               | 15.6 (5.1)                 | 15.0 (5.4)                        | 16.2 (5.9)                            | 0.20                 |
| Nulliparous                                                      | 47.8                       | 26.7                              | 66.0                                  | <0.001               |
| Gestational diabetes                                             | 4.6                        | 5.3                               | 5.4                                   | 0.89                 |
| Pre-eclampsia                                                    | 2.7                        | 2.7                               | 6.1                                   | 0.10                 |
| Age at menarche (years)                                          | 12.8 (1.5)                 | 12.7 (1.4)                        | 12.5 (1.5)                            | 0.07                 |
| <b>Paternal characteristics</b>                                  |                            |                                   |                                       |                      |
| Height (m)                                                       | 1.79 (0.08)                | 1.80 (0.08)                       | 1.80 (0.08)                           | 0.32                 |
| BMI (kg/m <sup>2</sup> )                                         | 26.3 (3.9)                 | 27.2 (4.2)                        | 26.6 (3.9)                            | 0.11                 |
| <b>Child characteristics</b>                                     |                            |                                   |                                       |                      |
| Male sex                                                         | 49.7                       | 50.7                              | 57.1                                  | 0.26                 |
| Gestational age at delivery (weeks)                              | 39.6 (1.6)                 | 38.9 (1.4)                        | 39.9 (1.6)                            | 0.0001               |
| Birthweight-for-gestational-age z-score (SD units)               | 0.18 (0.91)                | 0.51 (1.00)                       | 0.20 (1.00)                           | 0.01                 |
| Mid-childhood BMI z-score (SD units)                             | 0.49 (1.10)                | 0.83 (1.24)                       | 0.77 (1.15)                           | 0.008                |
| <b>Child pubertal development markers</b>                        |                            |                                   |                                       |                      |
| Number of visits from which information on puberty was collected | 5 (2)                      | 6 (2)                             | 6 (2)                                 | 0.68                 |
| Age at peak height velocity (years)                              | 12.2 (1.3)                 | 11.9 (1.3)                        | 12.1 (1.3)                            | 0.29                 |
| No. of serial height measures                                    | 13.3 (6.2)                 | 13.6 (6.4)                        | 13.2 (7.1)                            | 0.91                 |
| Puberty score at the mid-childhood visit (units)                 | 1.1 (0.4)                  | 1.1 (0.3)                         | 1.1 (0.4)                             | 0.93                 |
| Puberty score at 8 years (units)                                 | 1.3 (0.4)                  | 1.3 (0.4)                         | 1.3 (0.4)                             | 0.48                 |
| Puberty score at 9 years (units)                                 | 1.3 (0.4)                  | 1.4 (0.4)                         | 1.4 (0.4)                             | 0.48                 |
| Puberty score at 10 years (units)                                | 1.5 (0.5)                  | 1.5 (0.5)                         | 1.6 (0.5)                             | 0.12                 |
| Puberty score at 11 years (units)                                | 1.7 (0.6)                  | 1.8 (0.6)                         | 1.9 (0.7)                             | 0.05                 |
| Puberty score at the early adolescent visit (units)              | 2.6 (0.8)                  | 2.6 (0.8)                         | 2.6 (0.8)                             | 0.79                 |
| Puberty score at 14 years (units)                                | 3.0 (0.6)                  | 3.1 (0.6)                         | 3.1 (0.6)                             | 0.62                 |
| Puberty score at 15 years (units)                                | 3.3 (0.5)                  | 3.4 (0.5)                         | 3.3 (0.6)                             | 0.62                 |
| Puberty score at 16 years (units)                                | 3.5 (0.4)                  | 3.5 (0.4)                         | 3.5 (0.4)                             | 0.90                 |

(continued)

Supplementary Table SIII Continued

|                                                    | Vaginal<br>n = 736 (76.8%) | Planned cesarean<br>n = 75 (7.8%) | Unplanned cesarean<br>n = 147 (15.4%) | P-value <sup>a</sup> |
|----------------------------------------------------|----------------------------|-----------------------------------|---------------------------------------|----------------------|
| Pubic hair stage > I at 10 years                   | 44.7                       | 55.4                              | 52.4                                  | 0.14                 |
| Pubic hair stage > I at 11 years                   | 74.1                       | 73.0                              | 79.1                                  | 0.58                 |
| Pubic hair stage > I at the early adolescent visit | 96.7                       | 98.5                              | 95.4                                  | 0.51                 |
| Pubic hair stage > I at 14 years                   | 99.2                       | 100                               | 97.9                                  | 0.60                 |
| Pubic hair stage > I at 15 years                   | 99.7                       | 100                               | 100                                   | 0.87                 |
| Pubic hair stage > I at 16 years                   | 100                        | 100                               | 100                                   | –                    |
| Age at menarche—girls only (years)                 | 12.4 (0.9)                 | 12.3 (0.9)                        | 12.2 (0.8)                            | 0.40                 |

<sup>a</sup>P-value calculated using one-way ANOVA (for continuous variables) and chi-square tests (for categorical variables).
