# Supplementary material
Source: PubMed Central journal article supplement (PMC8730300)
Supplement: deab235_supplementary_table_s4.pdf [file deab235_supplementary_table_s4.pdf]

**Supplementary Table SIV Sensitivity analyses for associations of mode of delivery (cesarean versus vaginal delivery) with pubertal outcomes.**

|                                                                     | Complete case analyses <sup>a</sup> | Inverse probability of censoring weighting analyses <sup>a</sup> | Excluding GDM, pre-eclampsia, macrosomia <sup>b</sup> |
|---------------------------------------------------------------------|-------------------------------------|------------------------------------------------------------------|-------------------------------------------------------|
| <b>Boys</b>                                                         |                                     |                                                                  |                                                       |
| Age at peak height velocity (years) <sup>c</sup>                    | -0.21 (-0.41, 0.00)                 | -0.25 (-0.42, -0.08)                                             | -0.28 (-0.53, -0.03)                                  |
| Risk of earlier attainment of puberty score > 1 <sup>d</sup>        | 1.06 (0.99, 1.14)                   | 1.09 (1.00, 1.19)                                                | 1.08 (0.98, 1.19)                                     |
| Risk of earlier entry into Tanner pubic hair Stage > 1 <sup>d</sup> | 0.98 (0.85, 1.12)                   | 1.03 (0.90, 1.18)                                                | 1.09 (0.93, 1.27)                                     |
| <b>Girls</b>                                                        |                                     |                                                                  |                                                       |
| Age at peak height velocity (years) <sup>c</sup>                    | -0.06 (-0.28, 0.16)                 | 0.01 (-0.19, 0.21)                                               | -0.12 (-0.37, 0.13)                                   |
| Risk of earlier attainment of puberty score > 1 <sup>d</sup>        | 0.98 (0.90, 1.08)                   | 0.94 (0.85, 1.04)                                                | 1.02 (0.92, 1.13)                                     |
| Risk of earlier entry into Tanner pubic hair Stage > 1 <sup>d</sup> | 1.03 (0.89, 1.19)                   | 0.94 (0.81, 1.08)                                                | 1.09 (0.93, 1.27)                                     |
| Risk of earlier menarche <sup>d</sup>                               | 1.34 (1.01, 1.79)                   | 1.09 (0.80, 1.47)                                                | 1.43 (1.05, 1.97)                                     |

<sup>a</sup>Adjusted for gestational age at delivery, birthweight-for-gestational-age z-score, maternal age at enrollment, educational level, household income, race/ethnicity, smoking history, parity, gestational diabetes (GDM), pre-eclampsia, height, pre-pregnancy BMI, maternal age at menarche, paternal height and BMI.

<sup>b</sup>Adjusted for gestational age at delivery, birthweight-for-gestational-age z-score, maternal age at enrollment, educational level, household income, race/ethnicity, smoking history, parity, height, pre-pregnancy BMI, maternal age at menarche, paternal height and BMI.

<sup>c</sup>Effect estimates represent mean differences and 95% CI.

<sup>d</sup>Effect estimates represent hazard ratios and 95% CI.
