# Supplementary material
Source: PubMed Central journal article supplement (PMC8730300)
Supplement: deab235_supplementary_table_s5.pdf [file deab235_supplementary_table_s5.pdf]

**Supplementary Table SV Sensitivity analyses for associations of mode of delivery (planned, unplanned cesarean versus vaginal delivery) with pubertal outcomes.**

|                                                                     |              | Complete case analyses <sup>a</sup> | Inverse probability of censoring weighting analyses <sup>a</sup> | Excluding GDM, pre-eclampsia, macrosomia <sup>b</sup> |
|---------------------------------------------------------------------|--------------|-------------------------------------|------------------------------------------------------------------|-------------------------------------------------------|
| <b>Boys</b>                                                         |              |                                     |                                                                  |                                                       |
| Age at peak height velocity (years) <sup>c</sup>                    | Vaginal      | 0.00 (ref)                          | 0.00 (ref)                                                       | 0.00 (ref)                                            |
|                                                                     | CS planned   | -0.34 (-0.68, 0.01)                 | -0.31 (-0.57, -0.06)                                             | -0.44 (-0.90, 0.01)                                   |
|                                                                     | CS unplanned | -0.16 (-0.39, 0.08)                 | -0.22 (-0.43, -0.01)                                             | -0.22 (-0.50, 0.07)                                   |
| Risk of earlier attainment of puberty score > 1 <sup>d</sup>        | Vaginal      | 1.00 (ref)                          | 1.00 (ref)                                                       | 1.00 (ref)                                            |
|                                                                     | CS planned   | 1.10 (0.96, 1.25)                   | 1.13 (0.97, 1.31)                                                | 1.10 (0.94, 1.28)                                     |
|                                                                     | CS unplanned | 1.05 (0.96, 1.14)                   | 1.07 (0.97, 1.18)                                                | 1.07 (0.96, 1.20)                                     |
| Risk of earlier entry into Tanner pubic hair Stage > 1 <sup>d</sup> | Vaginal      | 1.00 (ref)                          | 1.00 (ref)                                                       | 1.00 (ref)                                            |
|                                                                     | CS planned   | 1.04 (0.82, 1.33)                   | 1.10 (0.87, 1.39)                                                | 1.03 (0.83, 1.27)                                     |
|                                                                     | CS unplanned | 0.97 (0.83, 1.12)                   | 1.01 (0.86, 1.18)                                                | 1.13 (0.92, 1.40)                                     |
| <b>Girls</b>                                                        |              |                                     |                                                                  |                                                       |
| Age at peak height velocity (years) <sup>c</sup>                    | Vaginal      | 0.00 (ref)                          | 0.00 (ref)                                                       | 0.00 (ref)                                            |
|                                                                     | CS planned   | 0.00 (-0.34, 0.35)                  | 0.08 (-0.25, 0.42)                                               | -0.03 (-0.41, 0.34)                                   |
|                                                                     | CS unplanned | -0.10 (-0.37, 0.17)                 | -0.02 (-0.26, 0.22)                                              | -0.18 (-0.50, 0.14)                                   |
| Risk of earlier attainment of puberty score > 1 <sup>d</sup>        | Vaginal      | 1.00 (ref)                          | 1.00 (ref)                                                       | 1.00 (ref)                                            |
|                                                                     | CS planned   | 0.91 (0.78, 1.05)                   | 0.88 (0.76, 1.02)                                                | 0.94 (0.81, 1.09)                                     |
|                                                                     | CS unplanned | 1.02 (0.91, 1.15)                   | 0.96 (0.85, 1.09)                                                | 1.08 (0.94, 1.23)                                     |
| Risk of earlier entry into Tanner pubic hair Stage > 1 <sup>d</sup> | Vaginal      | 1.00 (ref)                          | 1.00 (ref)                                                       | 1.00 (ref)                                            |
|                                                                     | CS planned   | 1.01 (0.82, 1.24)                   | 0.90 (0.72, 1.11)                                                | 1.03 (0.83, 1.27)                                     |
|                                                                     | CS unplanned | 1.03 (0.85, 1.25)                   | 0.94 (0.79, 1.13)                                                | 1.13 (0.92, 1.40)                                     |
| Risk of earlier menarche <sup>d</sup>                               | Vaginal      | 1.00 (ref)                          | 1.00 (ref)                                                       | 1.00 (ref)                                            |
|                                                                     | CS planned   | 1.26 (0.81, 1.96)                   | 1.20 (0.77, 1.88)                                                | 1.44 (0.88, 2.35)                                     |
|                                                                     | CS unplanned | 1.42 (1.01, 2.00)                   | 1.01 (0.69, 1.48)                                                | 1.43 (1.00, 2.06)                                     |

<sup>a</sup>Adjusted for gestational age at delivery, birthweight-for-gestational-age z-score, maternal age at enrollment, educational level, household income, race/ethnicity, smoking history, parity, GDM, pre-eclampsia, height, pre-pregnancy BMI, maternal age at menarche, paternal height and BMI.

<sup>b</sup>Adjusted for gestational age at delivery, birthweight-for-gestational-age z-score, maternal age at enrollment, educational level, household income, race/ethnicity, smoking history, parity, height, pre-pregnancy BMI, maternal age at menarche, paternal height and BMI.

<sup>c</sup>Effect estimates represent mean differences and 95% CI.

<sup>d</sup>Effect estimates represent hazard ratios and 95% CI.
